# Supplementary material for: Machine learning-based analysis identifies a 13-gene prognostic signature to improve the clinical outcomes of colorectal cancer
Source: PubMed Central journal article supplement — J Gastrointest Oncol. 2024 Oct 24;15(5):2100–16. doi: 10.21037/jgo-24-325 (PMC11565104; doi:10.21037/jgo-24-325), 2024-10-24
Supplement: jgo-15-05-2100-supplementary.pdf [file jgo-15-05-2100-supplementary.pdf]

Table S1 The collected prognostic models for CRC

| Model    | PMID     | Type | Author | Coefficient  | Gene name |
|----------|----------|------|--------|--------------|-----------|
| Model-1  | 35681225 | mRNA | Zheng  | 0.243        | COLEC12   |
| Model-1  | 35681225 | mRNA | Zheng  | 0.183        | EFEMP2    |
| Model-1  | 35681225 | mRNA | Zheng  | 0.243        | STON1     |
| Model-1  | 35681225 | mRNA | Zheng  | 0.211        | TCEAL7    |
| Model-1  | 35681225 | mRNA | Zheng  | 0.297        | C14orf132 |
| Model-2  | 32453965 | mRNA | Zheng  | -0.268184925 | AOC1      |
| Model-2  | 32453965 | mRNA | Zheng  | 0.145612613  | UCN       |
| Model-2  | 32453965 | mRNA | Zheng  | -0.361412144 | MTUS1     |
| Model-2  | 32453965 | mRNA | Zheng  | -0.46844737  | CDC20     |
| Model-2  | 32453965 | mRNA | Zheng  | 0.202331807  | SNCB      |
| Model-2  | 32453965 | mRNA | Zheng  | 0.176725272  | MAT1A     |
| Model-2  | 32453965 | mRNA | Zheng  | 0.115172814  | TUBB2B    |
| Model-2  | 32453965 | mRNA | Zheng  | -0.086924131 | GABRA4    |
| Model-2  | 32453965 | mRNA | Zheng  | 0.125962491  | ALPP      |
| Model-3  | 33658390 | mRNA | Yue    | 0.00482      | CCNB1     |
| Model-3  | 33658390 | mRNA | Yue    | -0.000151    | PIGR      |
| Model-3  | 33658390 | mRNA | Yue    | -0.000198    | CXCL1     |
| Model-3  | 33658390 | mRNA | Yue    | -0.00104     | CCL28     |
| Model-3  | 33658390 | mRNA | Yue    | -0.013       | PLK1      |
| Model-3  | 33658390 | mRNA | Yue    | 0.0201       | VEGFA     |
| Model-3  | 33658390 | mRNA | Yue    | -0.00195     | RPN2      |
| Model-3  | 33658390 | mRNA | Yue    | 0.00171      | CLU       |
| Model-3  | 33658390 | mRNA | Yue    | 0.0117       | FOXM1     |
| Model-3  | 33658390 | mRNA | Yue    | 0.00144      | TIMP1     |
| Model-3  | 33658390 | mRNA | Yue    | 0.0167       | PCSK5     |
| Model-3  | 33658390 | mRNA | Yue    | -0.00826     | MPC1      |
| Model-3  | 33658390 | mRNA | Yue    | 0.0405       | CD36      |
| Model-3  | 33658390 | mRNA | Yue    | 0.0000133    | IGHG1     |
| Model-3  | 33658390 | mRNA | Yue    | 0.00373      | IGFBP3    |
| Model-4  | 35067161 | mRNA | DU     | -0.295       | ACACA     |
| Model-4  | 35067161 | mRNA | DU     | -0.158       | NFS1      |
| Model-4  | 35067161 | mRNA | DU     | -0.289       | GSS       |
| Model-5  | 30755640 | mRNA | Lee    | 0.52         | HSPA1L    |
| Model-5  | 30755640 | mRNA | Lee    | -1.156       | PUM1      |
| Model-5  | 30755640 | mRNA | Lee    | -1.239       | UBE2D2    |
| Model-5  | 30755640 | mRNA | Lee    | 0.309        | HSP27     |
| Model-6  | 36267311 | mRNA | Du     | 0.00767      | CHGA      |
| Model-6  | 36267311 | mRNA | Du     | 0.01449      | CLU       |
| Model-6  | 36267311 | mRNA | Du     | -0.05963     | PLK1      |
| Model-6  | 36267311 | mRNA | Du     | 0.01635      | AXIN2     |
| Model-6  | 36267311 | mRNA | Du     | -0.15748     | NR3C2     |
| Model-6  | 36267311 | mRNA | Du     | -0.03055     | IL17RB    |
| Model-6  | 36267311 | mRNA | Du     | 0.02558      | GCG       |
| Model-6  | 36267311 | mRNA | Du     | 0.07265      | AJUBA     |
| Model-7  | 36532065 | mRNA | Ma     | -0.0843825   | CXCL8     |
| Model-7  | 36532065 | mRNA | Ma     | -0.043955    | MMP12     |
| Model-7  | 36532065 | mRNA | Ma     | -0.127046    | GDF15     |
| Model-7  | 36532065 | mRNA | Ma     | 0.09601238   | SPP1      |
| Model-7  | 36532065 | mRNA | Ma     | -0.0656746   | NR3C2     |
| Model-8  | 33357130 | mRNA | Liu    | 0.487140513  | ULK3      |
| Model-8  | 33357130 | mRNA | Liu    | 0.399891374  | PELP1     |
| Model-8  | 33357130 | mRNA | Liu    | 0.60434954   | WIPI2     |
| Model-8  | 33357130 | mRNA | Liu    | 0.265015269  | DAPK1     |
| Model-8  | 33357130 | mRNA | Liu    | 1.572033425  | MAP1LC3C  |
| Model-8  | 33357130 | mRNA | Liu    | 1.011611924  | RAB7A     |
| Model-9  | 33034614 | mRNA | Xu     | -4.3781      | FGFR4     |
| Model-9  | 33034614 | mRNA | Xu     | -0.7465      | LGR6      |
| Model-9  | 33034614 | mRNA | Xu     | 3.9474       | TRBV12-3  |
| Model-9  | 33034614 | mRNA | Xu     | -4.8243      | NUDT6     |
| Model-9  | 33034614 | mRNA | Xu     | -4.5562      | MET       |
| Model-9  | 33034614 | mRNA | Xu     | 1.1468       | PDIA2     |
| Model-9  | 33034614 | mRNA | Xu     | -1.5898      | ORM1      |
| Model-9  | 33034614 | mRNA | Xu     | -1.0328      | IGKV3D-20 |
| Model-9  | 33034614 | mRNA | Xu     | -0.7592      | THRB      |
| Model-9  | 33034614 | mRNA | Xu     | -1.2434      | WNT5A     |
| Model-9  | 33034614 | mRNA | Xu     | -2.2298      | FGF18     |
| Model-9  | 33034614 | mRNA | Xu     | -0.116       | ACTG1     |
| Model-10 | 32096169 | mRNA | Bai    | -0.429       | SH3BP2    |
| Model-10 | 32096169 | mRNA | Bai    | -0.088       | CCL24     |
| Model-10 | 32096169 | mRNA | Bai    | -0.132       | RORC      |
| Model-10 | 32096169 | mRNA | Bai    | -0.253       | IL7       |
| Model-10 | 32096169 | mRNA | Bai    | 0.05         | MC1R      |
| Model-10 | 32096169 | mRNA | Bai    | 0.0975       | IL1RL2    |
| Model-10 | 32096169 | mRNA | Bai    | 0.385        | IL20RB    |
| Model-10 | 32096169 | mRNA | Bai    | 0.261        | ORFP      |
| Model-10 | 32096169 | mRNA | Bai    | 0.153        | HAMP      |
| Model-10 | 32096169 | mRNA | Bai    | -0.364       | CD13      |

Table S1 (continued)

Table S1 (continued)

| Model    | PMID     | Type | Author | Coefficient | Gene name        |
|----------|----------|------|--------|-------------|------------------|
| Model-10 | 32096169 | mRNA | Bai    | 0.363       | <i>S100Z</i>     |
| Model-10 | 32096169 | mRNA | Bai    | 0.273       | <i>NTF4</i>      |
| Model-10 | 32096169 | mRNA | Bai    | 0.081       | <i>AVPR1B</i>    |
| Model-11 | 36389694 | mRNA | Wang   | -0.145099   | <i>CXCL9</i>     |
| Model-11 | 36389694 | mRNA | Wang   | -0.130486   | <i>CXCL13</i>    |
| Model-11 | 36389694 | mRNA | Wang   | 0.230145    | <i>CCL8</i>      |
| Model-11 | 36389694 | mRNA | Wang   | -0.072124   | <i>PLA2G2A</i>   |
| Model-11 | 36389694 | mRNA | Wang   | 0.297347    | <i>TRIB2</i>     |
| Model-12 | 38144182 | mRNA | Jiang  | 0.112       | <i>FCRL1</i>     |
| Model-12 | 38144182 | mRNA | Jiang  | 0.252       | <i>WNT16</i>     |
| Model-12 | 38144182 | mRNA | Jiang  | 0.13        | <i>GRIK2</i>     |
| Model-12 | 38144182 | mRNA | Jiang  | 0.07        | <i>FCRL1</i>     |
| Model-12 | 38144182 | mRNA | Jiang  | 0.252       | <i>WNT16</i>     |
| Model-12 | 38144182 | mRNA | Jiang  | 0.13        | <i>GRIK2</i>     |
| Model-12 | 38144182 | mRNA | Jiang  | 0.07        | <i>ZMAT1</i>     |
| Model-12 | 38144182 | mRNA | Jiang  | 0.005       | <i>ZG16</i>      |
| Model-12 | 38144182 | mRNA | Jiang  | 0.103       | <i>DRD4</i>      |
| Model-12 | 38144182 | mRNA | Jiang  | 0.044       | <i>MAPK12</i>    |
| Model-12 | 38144182 | mRNA | Jiang  | 0.22        | <i>OR51B5</i>    |
| Model-12 | 38144182 | mRNA | Jiang  | 0.004       | <i>PRSS21</i>    |
| Model-12 | 38144182 | mRNA | Jiang  | 0.004       | <i>MAGEA3</i>    |
| Model-13 | 34735373 | mRNA | Xv     | 0.2798524   | <i>RCN3</i>      |
| Model-13 | 34735373 | mRNA | Xv     | -0.4867349  | <i>RETNLB</i>    |
| Model-13 | 34735373 | mRNA | Xv     | 0.0587669   | <i>MMP19</i>     |
| Model-13 | 34735373 | mRNA | Xv     | 0.2137264   | <i>DACT1</i>     |
| Model-13 | 34735373 | mRNA | Xv     | 0.3216534   | <i>OLFM2</i>     |
| Model-13 | 34735373 | mRNA | Xv     | 0.0867799   | <i>SCG2</i>      |
| Model-13 | 34735373 | mRNA | Xv     | 0.1622284   | <i>TUBB6</i>     |
| Model-13 | 34735373 | mRNA | Xv     | -0.0802369  | <i>REG4</i>      |
| Model-13 | 34735373 | mRNA | Xv     | 0.1206758   | <i>SLC11A1</i>   |
| Model-13 | 34735373 | mRNA | Xv     | 0.228322    | <i>SNCG</i>      |
| Model-13 | 34735373 | mRNA | Xv     | 0.080146    | <i>TREM2</i>     |
| Model-13 | 34735373 | mRNA | Xv     | 0.1174957   | <i>C2orf74</i>   |
| Model-13 | 34735373 | mRNA | Xv     | -0.9191942  | <i>CCL22</i>     |
| Model-13 | 34735373 | mRNA | Xv     | 0.0118777   | <i>CHST3</i>     |
| Model-14 | 38045683 | mRNA | Huang  | 0.31775133  | <i>CYP19A1</i>   |
| Model-14 | 38045683 | mRNA | Huang  | 0.02442698  | <i>ACSL6</i>     |
| Model-14 | 38045683 | mRNA | Huang  | 0.49898014  | <i>LRP2</i>      |
| Model-14 | 38045683 | mRNA | Huang  | 0.21861865  | <i>OSBPL3</i>    |
| Model-14 | 38045683 | mRNA | Huang  | 0.13954724  | <i>SLCO1A2</i>   |
| Model-14 | 38045683 | mRNA | Huang  | 0.37098995  | <i>ACOX1</i>     |
| Model-14 | 38045683 | mRNA | Huang  | 0.11749459  | <i>PPARGC1A</i>  |
| Model-14 | 38045683 | mRNA | Huang  | 0.16809725  | <i>TNFAIP8L3</i> |
| Model-15 | 32564470 | mRNA | Wang   | 0.639       | <i>SLC10A2</i>   |
| Model-15 | 32564470 | mRNA | Wang   | 0.387       | <i>FGF2</i>      |
| Model-15 | 32564470 | mRNA | Wang   | -0.094      | <i>CCL28</i>     |
| Model-15 | 32564470 | mRNA | Wang   | 0.012       | <i>NDRG1</i>     |
| Model-15 | 32564470 | mRNA | Wang   | 0.124       | <i>ESM1</i>      |
| Model-15 | 32564470 | mRNA | Wang   | 0.378       | <i>UCN</i>       |
| Model-15 | 32564470 | mRNA | Wang   | 0.254       | <i>UTS2</i>      |
| Model-15 | 32564470 | mRNA | Wang   | 0.129       | <i>TRDC</i>      |
| Model-16 | 36524971 | mRNA | Li     | -0.20049    | <i>ASRGL1</i>    |
| Model-16 | 36524971 | mRNA | Li     | -0.1072     | <i>GSR</i>       |
| Model-16 | 36524971 | mRNA | Li     | -0.08696    | <i>ASAH1</i>     |
| Model-16 | 36524971 | mRNA | Li     | -0.06502    | <i>BCL10</i>     |
| Model-16 | 36524971 | mRNA | Li     | 0.001969    | <i>SNAI1</i>     |
| Model-16 | 36524971 | mRNA | Li     | 0.026865    | <i>TRIP10</i>    |
| Model-16 | 36524971 | mRNA | Li     | 0.063611    | <i>TSC22D3</i>   |
| Model-16 | 36524971 | mRNA | Li     | 0.072751    | <i>LRRRC8A</i>   |
| Model-16 | 36524971 | mRNA | Li     | 0.075148    | <i>PHF2</i>      |
| Model-16 | 36524971 | mRNA | Li     | 0.077261    | <i>SERPINE1</i>  |
| Model-16 | 36524971 | mRNA | Li     | 0.110934    | <i>RNASET2</i>   |
| Model-16 | 36524971 | mRNA | Li     | 0.139311    | <i>DNAJB2</i>    |
| Model-16 | 36524971 | mRNA | Li     | 0.205895    | <i>UCHL1</i>     |
| Model-16 | 36524971 | mRNA | Li     | 0.209549    | <i>GAL</i>       |
| Model-17 | 36319976 | mRNA | Wang   | 0.6374      | <i>DKC1</i>      |
| Model-17 | 36319976 | mRNA | Wang   | 0.7798      | <i>NSUN5</i>     |
| Model-17 | 36319976 | mRNA | Wang   | 0.2717      | <i>FLNA</i>      |
| Model-17 | 36319976 | mRNA | Wang   | -0.2354     | <i>CSE1L</i>     |
| Model-18 | 34364366 | mRNA | Wang   | 0.1217      | <i>A2ML1</i>     |
| Model-18 | 34364366 | mRNA | Wang   | 0.03442     | <i>CALB2</i>     |
| Model-18 | 34364366 | mRNA | Wang   | -0.6693     | <i>CD1B</i>      |
| Model-18 | 34364366 | mRNA | Wang   | 0.04806     | <i>COL22A1</i>   |
| Model-18 | 34364366 | mRNA | Wang   | 0.4471      | <i>FCRL2</i>     |
| Model-18 | 34364366 | mRNA | Wang   | 0.00069     | <i>GPX3</i>      |
| Model-18 | 34364366 | mRNA | Wang   | 0.05368     | <i>HAND1</i>     |
| Model-18 | 34364366 | mRNA | Wang   | 0.0023      | <i>IDO1</i>      |

Table S1 (continued)

Table S1 (continued)

| Model    | PMID     | Type | Author | Coefficient  | Gene name |
|----------|----------|------|--------|--------------|-----------|
| Model-18 | 34364366 | mRNA | Wang   | 0.006        | LAMP5     |
| Model-18 | 34364366 | mRNA | Wang   | 0.07625      | MAP2      |
| Model-18 | 34364366 | mRNA | Wang   | 0.02431      | MMRN1     |
| Model-18 | 34364366 | mRNA | Wang   | 0.1085       | NKAIN4    |
| Model-18 | 34364366 | mRNA | Wang   | 0.3541       | VAX2      |
| Model-19 | 37300722 | mRNA | Wu     | -0.4862      | PRKCB     |
| Model-19 | 37300722 | mRNA | Wu     | 0.3205       | GSKIP     |
| Model-19 | 37300722 | mRNA | Wu     | -0.1031      | MMP3      |
| Model-19 | 37300722 | mRNA | Wu     | 0.3287       | RNF112    |
| Model-19 | 37300722 | mRNA | Wu     | -0.6705      | TRAP1     |
| Model-19 | 37300722 | mRNA | Wu     | -0.4626      | TXN       |
| Model-19 | 37300722 | mRNA | Wu     | -0.1189      | VNN1      |
| Model-19 | 37300722 | mRNA | Wu     | 0.1899       | ASS1      |
| Model-19 | 37300722 | mRNA | Wu     | 0.4778       | FAM107A   |
| Model-19 | 37300722 | mRNA | Wu     | -0.3975      | FBXO32    |
| Model-19 | 37300722 | mRNA | Wu     | -0.5059      | PCK2      |
| Model-19 | 37300722 | mRNA | Wu     | 0.6073       | SRD5A1    |
| Model-19 | 37300722 | mRNA | Wu     | 1.0681       | TRAF2     |
| Model-19 | 37300722 | mRNA | Wu     | -0.4725      | GSR       |
| Model-19 | 37300722 | mRNA | Wu     | -0.4652      | GSS       |
| Model-19 | 37370046 | mRNA | Xiang  | 0.325369     | KLF9      |
| Model-19 | 37370046 | mRNA | Xiang  | 0.156747     | INHBA     |
| Model-19 | 37370046 | mRNA | Xiang  | -0.285912    | CGREF1    |
| Model-19 | 37370046 | mRNA | Xiang  | -0.54757     | MCM2      |
| Model-20 | 36505481 | mRNA | Cui    | 0.0765       | SEMA4C    |
| Model-20 | 36505481 | mRNA | Cui    | 0.0304       | PIM1      |
| Model-20 | 36505481 | mRNA | Cui    | 0.0035       | TIMP1     |
| Model-20 | 36505481 | mRNA | Cui    | -0.03625     | JAGN1     |
| Model-20 | 36505481 | mRNA | Cui    | 0.0332       | TRIB2     |
| Model-20 | 36505481 | mRNA | Cui    | 0.0546       | ASNS      |
| Model-20 | 36505481 | mRNA | Cui    | 0.0049       | RPS24     |
| Model-20 | 36505481 | mRNA | Cui    | -0.0076      | NOX1      |
| Model-21 | 36591255 | mRNA | Liang  | -0.2869      | ADIPOQ    |
| Model-21 | 36591255 | mRNA | Liang  | 0.77205      | CD36      |
| Model-21 | 36591255 | mRNA | Liang  | -0.15359     | CCL24     |
| Model-21 | 36591255 | mRNA | Liang  | 1.041035     | INHBE     |
| Model-21 | 36591255 | mRNA | Liang  | 0.584717     | UCN       |
| Model-21 | 36591255 | mRNA | Liang  | 0.310954     | IL1RL2    |
| Model-21 | 36591255 | mRNA | Liang  | 0.599037     | TRIM58    |
| Model-21 | 36591255 | mRNA | Liang  | 0.322746     | RBCK1     |
| Model-21 | 36591255 | mRNA | Liang  | 0.526967     | MC1R      |
| Model-21 | 36591255 | mRNA | Liang  | -0.78226     | PPARGC1A  |
| Model-21 | 36591255 | mRNA | Liang  | -0.2145      | LGALS2    |
| Model-22 | 37762157 | mRNA | Jin    | -0.097771129 | MMP3      |
| Model-22 | 37762157 | mRNA | Jin    | -0.06324672  | HSPA8     |
| Model-22 | 37762157 | mRNA | Jin    | -0.056664141 | PTGIS     |
| Model-22 | 37762157 | mRNA | Jin    | -0.056371262 | CPT2      |
| Model-22 | 37762157 | mRNA | Jin    | -0.031097946 | GPI       |
| Model-22 | 37762157 | mRNA | Jin    | 0.011962818  | CDKN2A    |
| Model-22 | 37762157 | mRNA | Jin    | 0.024967708  | SPP1      |
| Model-22 | 37762157 | mRNA | Jin    | 0.025154411  | GRP       |
| Model-22 | 37762157 | mRNA | Jin    | 0.032478659  | APOE      |
| Model-22 | 37762157 | mRNA | Jin    | 0.032667622  | CHGA      |
| Model-22 | 37762157 | mRNA | Jin    | 0.040915171  | CAV1      |
| Model-22 | 37762157 | mRNA | Jin    | 0.05604283   | GSTM1     |
| Model-22 | 37762157 | mRNA | Jin    | 0.073841708  | VEGFA     |
| Model-22 | 37762157 | mRNA | Jin    | 0.083911131  | LAMA2     |
| Model-22 | 37762157 | mRNA | Jin    | 0.10382603   | TIMP1     |
| Model-22 | 37762157 | mRNA | Jin    | 0.107521782  | AGRN      |
| Model-22 | 37762157 | mRNA | Jin    | 0.186021817  | HSPA1A    |
| Model-22 | 37762157 | mRNA | Jin    | 0.224930455  | SNAP25    |
| Model-23 | 32036725 | mRNA | Li     | -0.8181      | BRCA1     |
| Model-23 | 32036725 | mRNA | Li     | 0.5093       | TERT      |
| Model-23 | 32036725 | mRNA | Li     | -0.7989      | TDRD7     |
| Model-23 | 32036725 | mRNA | Li     | -0.7152      | PPARGC1A  |
| Model-23 | 32036725 | mRNA | Li     | 0.7698       | LUZP4     |
| Model-23 | 32036725 | mRNA | Li     | 1.1488       | CELF4     |
| Model-23 | 32036725 | mRNA | Li     | -0.8421      | ZC3H12C   |
| Model-23 | 32036725 | mRNA | Li     | 0.6121       | PNLDC1    |
| Model-24 | 32036725 | mRNA | Wang   | 0.527        | ZBTB34    |
| Model-24 | 32036725 | mRNA | Wang   | -0.292       | SOWAHA    |
| Model-24 | 32036725 | mRNA | Wang   | 0.861        | SLC4A2    |
| Model-24 | 32036725 | mRNA | Wang   | 0.474        | ANKRD16   |
| Model-24 | 32036725 | mRNA | Wang   | -1.512       | CLEC16A   |
| Model-24 | 32036725 | mRNA | Wang   | -0.449       | KIF15     |
| Model-24 | 32036725 | mRNA | Wang   | -0.336       | MIPEP     |
| Model-24 | 32036725 | mRNA | Wang   | 0.603        | RNF113A   |

Table S1 (continued)

Table S1 (continued)

| Model    | PMID     | Type | Author | Coefficient | Gene name |
|----------|----------|------|--------|-------------|-----------|
| Model-24 | 32036725 | mRNA | Wang   | 0.15        | GJB6      |
| Model-24 | 32036725 | mRNA | Wang   | -0.463      | RPP14     |
| Model-24 | 32036725 | mRNA | Wang   | 0.144       | HCRTR1    |
| Model-24 | 32036725 | mRNA | Wang   | -0.609      | TUBA1C    |
| Model-24 | 32036725 | mRNA | Wang   | 0.837       | PMM2      |
| Model-24 | 32036725 | mRNA | Wang   | 0.342       | JAG2      |
| Model-24 | 32036725 | mRNA | Wang   | -0.78       | RPN2      |
| Model-25 | 33536348 | mRNA | Li     | 0.1235      | MAP2      |
| Model-25 | 33536348 | mRNA | Li     | 0.0873      | NKAIN4    |
| Model-25 | 33536348 | mRNA | Li     | 0.2936      | VAX2      |
| Model-25 | 33536348 | mRNA | Li     | 0.0321      | CALB2     |
| Model-25 | 33536348 | mRNA | Li     | 0.3958      | FCRL2     |
| Model-25 | 33536348 | mRNA | Li     | 0.0471      | HAND1     |
| Model-25 | 33536348 | mRNA | Li     | 0.0986      | A2ML1     |
| Model-25 | 33536348 | mRNA | Li     | 0.002       | IDO1      |
| Model-25 | 33536348 | mRNA | Li     | 0.0134      | COL22A1   |
| Model-25 | 33536348 | mRNA | Li     | 0.4143      | CD1B      |
| Model-26 | 36827833 | mRNA | Yang   | 0.033847    | SFRP2     |
| Model-26 | 36827833 | mRNA | Yang   | 0.08733     | MIR100HG  |
| Model-26 | 36827833 | mRNA | Yang   | 0.02377     | CYP1B1    |
| Model-26 | 36827833 | mRNA | Yang   | 0.00135     | C5orf46   |
| Model-26 | 36827833 | mRNA | Yang   | -0.06617    | CXCL13.   |
| Model-27 | 36319976 | mRNA | Wang   | 0.6374      | DKC1      |
| Model-27 | 36319976 | mRNA | Wang   | 0.7798      | NSUN5     |
| Model-27 | 36319976 | mRNA | Wang   | 0.2717      | FLNA      |
| Model-27 | 36319976 | mRNA | Wang   | -0.2354     | CSE1L     |
| Model-28 | 36299603 | mRNA | chen   | -1.74       | AARS2     |
| Model-28 | 36299603 | mRNA | chen   | 0.36        | ATF4      |
| Model-28 | 36299603 | mRNA | chen   | 2.08        | CARS2     |
| Model-28 | 36299603 | mRNA | chen   | 2.98        | CRP       |
| Model-28 | 36299603 | mRNA | chen   | 0.4         | CYBA      |
| Model-28 | 36299603 | mRNA | chen   | -0.61       | FOXO3     |
| Model-28 | 36299603 | mRNA | chen   | 0.68        | GPX1      |
| Model-28 | 36299603 | mRNA | chen   | 0.06        | IL1B      |
| Model-28 | 36299603 | mRNA | chen   | 0.52        | MAPK8     |
| Model-28 | 36299603 | mRNA | chen   | 0.47        | MRPL44    |
| Model-28 | 36299603 | mRNA | chen   | 0.09        | MTFMT     |
| Model-28 | 36299603 | mRNA | chen   | 1.43        | NOS1      |
| Model-28 | 36299603 | mRNA | chen   | 1.04        | OSGIN2    |
| Model-28 | 36299603 | mRNA | chen   | 0.14        | SOD2      |
| Model-29 | 35848857 | mRNA | Han    | 0.06884398  | HSD17B2   |
| Model-29 | 35848857 | mRNA | Han    | 0.09017162  | KLK6      |
| Model-29 | 35848857 | mRNA | Han    | 0.17856722  | FOLR1     |
| Model-29 | 35848857 | mRNA | Han    | -0.03860415 | HTR2B     |
| Model-29 | 35848857 | mRNA | Han    | 0.25070634  | GAS6      |
| Model-29 | 35848857 | mRNA | Han    | 0.08315342  | CHN2      |
| Model-29 | 35848857 | mRNA | Han    | -0.08958095 | MMP12     |
| Model-29 | 35848857 | mRNA | Han    | -0.065265   | SPAG1     |
| Model-29 | 35848857 | mRNA | Han    | -0.10217968 | CKMT2     |
| Model-29 | 35848857 | mRNA | Han    | -0.13004981 | GZMB      |
| Model-29 | 35848857 | mRNA | Han    | -0.25104036 | CRYM      |
| Model-29 | 35848857 | mRNA | Han    | -0.43832989 | RAB15     |
| Model-29 | 35848857 | mRNA | Han    | -0.3750716  | DIMT1     |
| Model-29 | 35848857 | mRNA | Han    | 0.07178523  | KCNE3     |
| Model-29 | 35848857 | mRNA | Han    | 0.16357082  | NT5E      |
| Model-29 | 35848857 | mRNA | Han    | 0.06645897  | EPHA2     |
| Model-29 | 35848857 | mRNA | Han    | 0.3001942   | PCDHB2    |
| Model-30 | 35698180 | mRNA | Wang   | -0.0229     | CDH1      |
| Model-30 | 35698180 | mRNA | Wang   | -0.0153     | HLA-DRA   |
| Model-30 | 35698180 | mRNA | Wang   | -0.0134     | CCL11     |
| Model-30 | 35698180 | mRNA | Wang   | -0.011      | NOS2      |
| Model-30 | 35698180 | mRNA | Wang   | -0.01       | NAT2      |
| Model-30 | 35698180 | mRNA | Wang   | -0.0011     | TP53      |
| Model-30 | 35698180 | mRNA | Wang   | 0.0414      | TIMP1     |

CRC, colorectal cancer.
